# Supplementary material for: Lignocellulosic biomass-derived, graphene sheet-like porous activated carbon for electrochemical supercapacitor and catechin sensing
Source: Royal Society of Chemistry journal article supplement (doi:10.1039/c7ra07810b), 2017-01-01
Supplement: c7ra07810b1.pdf [file c7ra07810b1.pdf]

## Supporting Information

### Lignocellulosic Biomass-Derived, Graphene Sheet-like Porous Activated Carbon for Electrochemical Supercapacitor and Catechin Sensing

V. Veeramani,<sup>a,b</sup> M. Sivakumar,<sup>b</sup> S.-M. Chen,<sup>b\*</sup> R. Madhu,<sup>c</sup> Hatem R. Alamri,<sup>d</sup> Zeid A. Allothman,<sup>e</sup> Md. Shahriar A. Hossain,<sup>e,f</sup> C.-K. Chen,<sup>b</sup> Yusuke Yamauchi,<sup>e,f</sup> N. Miyamoto,<sup>c</sup> and Kevin C.-W. Wu<sup>a\*</sup>

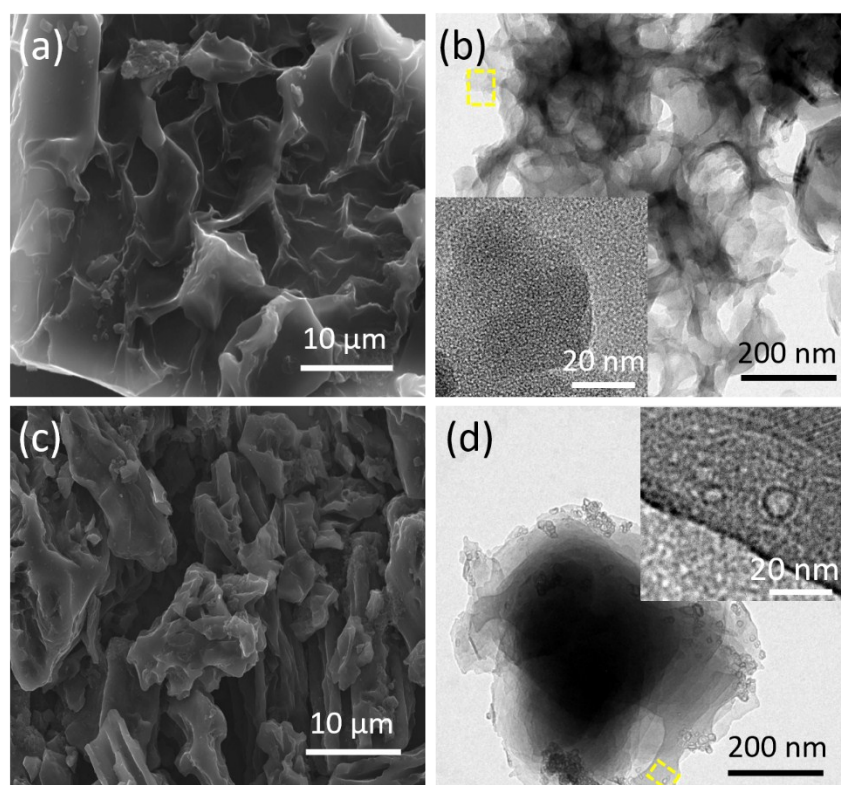

**Figure S1.** SEM and HR-TEM images of the as-synthesized AC-700 (a and b), and AC-900 (c and d) samples. Inset indicates the corresponding high magnification images.

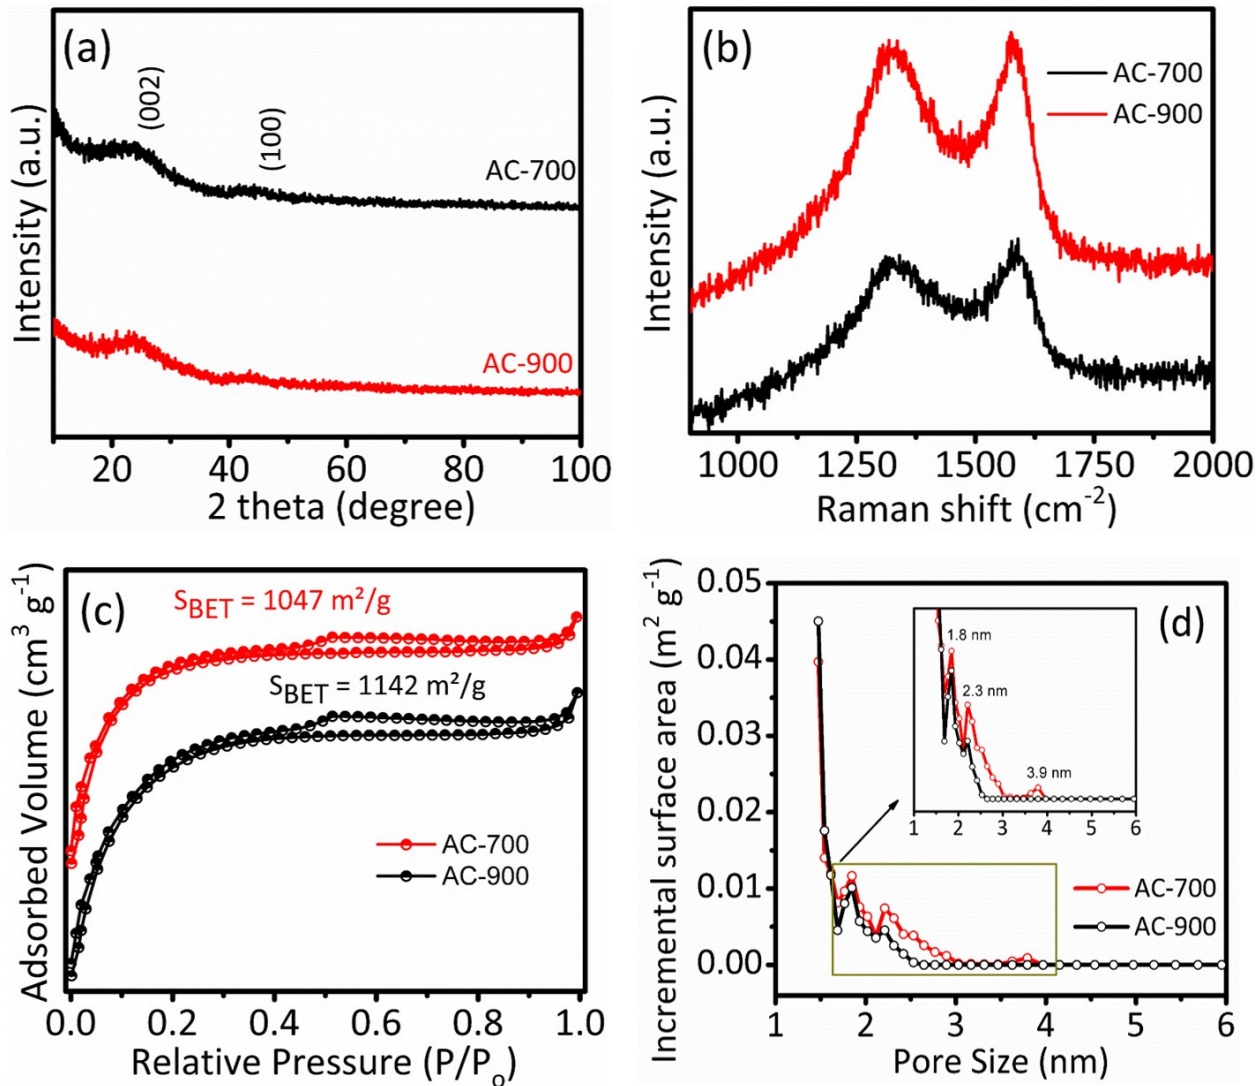

**Figure S2.** XRD (a), Raman spectroscopy (b),  $\text{N}_2$  adsorption/desorption isotherms (c), and Pore size distribution profile studies (d) for as-synthesized AC-700, and AC-900 samples.

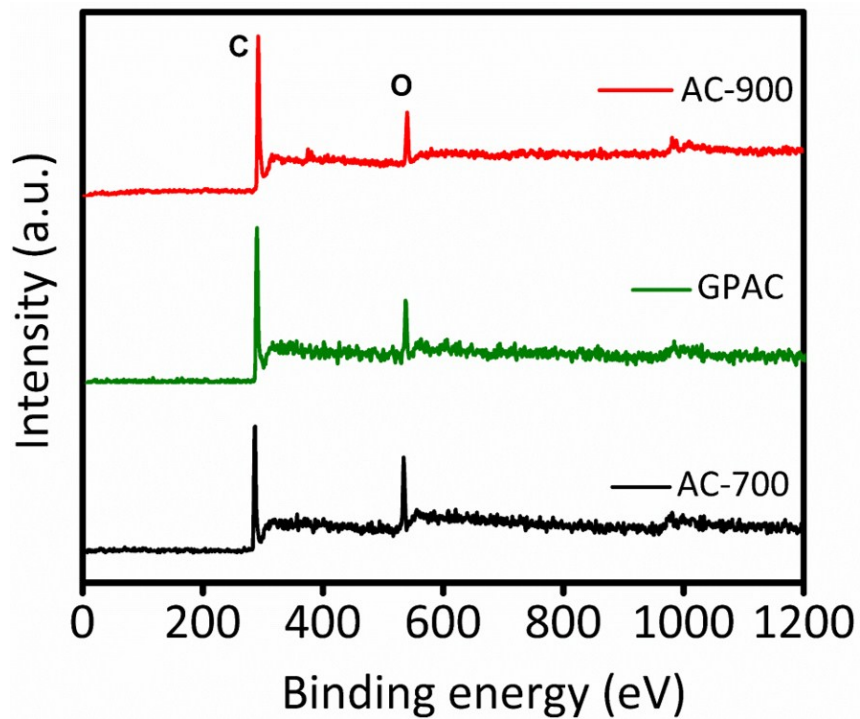

**Figure S3.** XPS full survey spectra for the as-synthesized AC-700, GPAC, and AC-900 samples.

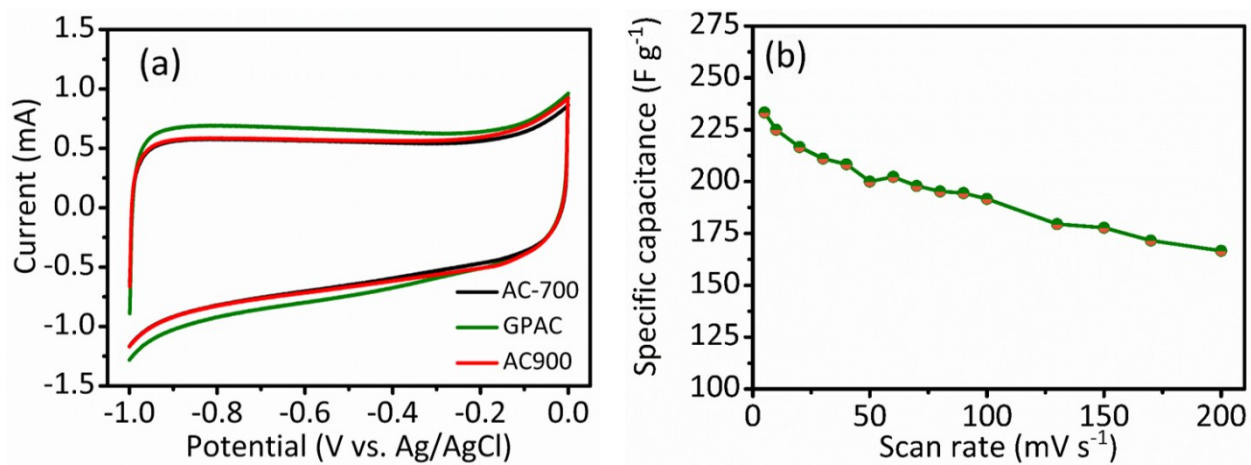

**Figure S4.** (a) CV curves at fixed scan rate  $5 \text{ mV s}^{-1}$  for various electrode. (b) GPAC electrode as a function of scan rate vs specific capacitance.

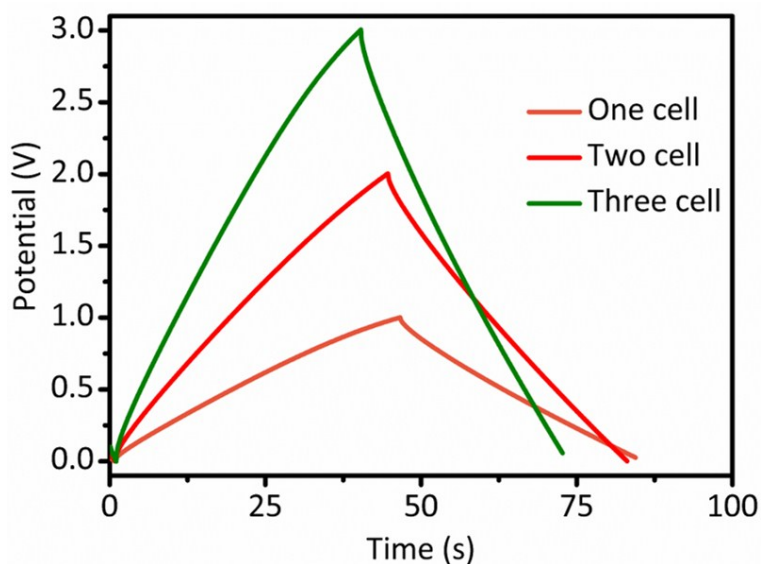

**Figure S5.** (A) GCD profiles of the solid-state ASC (GPAC/PVA/KOH/GPAC) device at one cell, two cell and three cell device connected in series.

**Table S1.** Comparison of the specific capacitance value with previously reported biomass-derived carbon in literatures.

| Materials            | Electrolyte      | Specific capacitance ( $F g^{-1}$ ) | Ref              |
|----------------------|------------------|-------------------------------------|------------------|
| GHAC-900             | 2.0 M KOH        | 63                                  | [5]              |
| SPC-1000             | 1 M $Li_2SO_4$   | 121                                 | [9]              |
| ACSB                 | 6 M KOH          | 202                                 | [37]             |
| EDMCT                | 6 M KOH          | 90                                  | [S1]             |
| Carbon <sub>s2</sub> | 1 M LiOH         | 204                                 | [S2]             |
| ZAC-10               | 1.0 M $H_2SO_4$  | 127                                 | [S3]             |
| Coconut kernel       | 1.0 M $H_2SO_4$  | 173                                 | [S4]             |
| sugarcane            | 0.5 M $H_2SO_4$  | 232                                 | [S5]             |
| Rice husk            | 3 M KCl          | 210                                 | [S6]             |
| Corn grains          | 6 M KOH          | 257                                 | [S7]             |
| <b>GPAC</b>          | <b>2.0 M KOH</b> | <b>233</b>                          | <b>This work</b> |

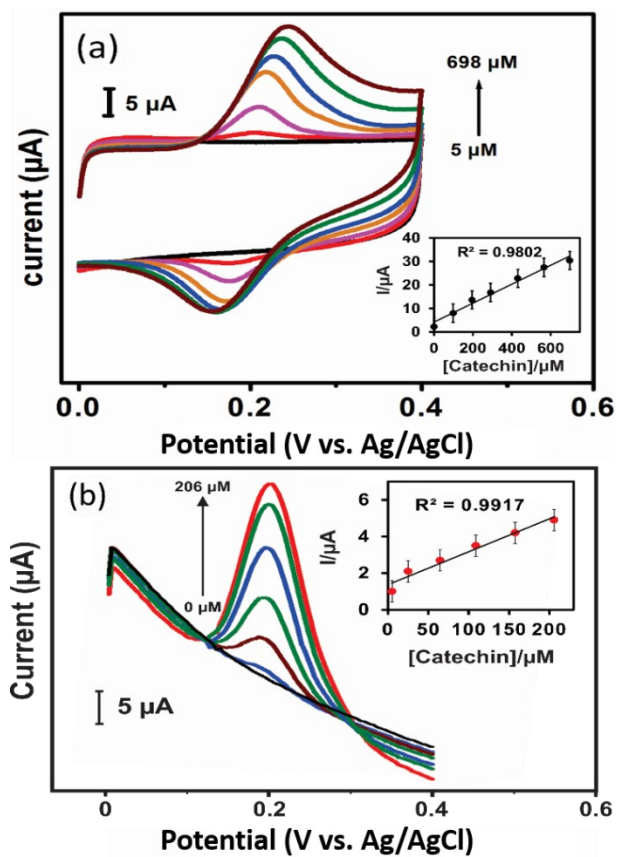

**Figure S6.** (a) Various CA concentrations from 49  $\mu\text{M}$  to 950  $\mu\text{M}$ . Electrode: GPAC modified GCE. (b) DPV curves of GPAC modified GCE with different concentrations of CA using a standard addition method. Electrolyte: 0.1 M PBS (pH 7.0) solution; scan rate: 50  $\text{mV s}^{-1}$ .

**Table S2.** Comparison of the analytical parameters with previously reported literatures.

| Electrode Materials                        | Linear Range ( $\mu\text{M}$ ) | Limit of Detection ( $\mu\text{M}$ ) | Sensitivity ( $\mu\text{A}/\mu\text{M}\cdot\text{cm}^2$ ) | Ref              |
|--------------------------------------------|--------------------------------|--------------------------------------|-----------------------------------------------------------|------------------|
| Pt/MnO <sub>2</sub> /f-MWCNT               | 2-950                          | 0.02                                 | -                                                         | [25]             |
| f-MWCNT/YHCF                               | 5–200                          | 0.28                                 | 1.311                                                     | [26]             |
| Poly-aspartic acid                         | 0.2-30                         | 0.07                                 | -                                                         | [40]             |
| MWCNT                                      | 0.10-2.69                      | 0.017                                | -                                                         | [41]             |
| Ni(II) complex and thiol on gold electrode | 3.31–25.3                      | 0.82                                 | -                                                         | [42]             |
| <b>GPAC</b>                                | <b>4-368</b>                   | <b>0.67</b>                          | <b>7.2</b>                                                | <b>This work</b> |

## Reference

- [S1] Y. Qu, G. Zan, J. Wang and Q. Wu, *J. Mater. Chem. A*, 2016, **4**, 4296–4304.
- [S2] Y. Li, Q. Zhang, J. Zhang, L. Jin, X. Zhao and T. Xu, *Sci. Reports*, 2015, **5**, 14155.
- [S3] R. Madhu, V. Veeramani, S.-M. Chen, P. Veerakumar, S.-B. Liu and N. Miyamoto, *Phys. Chem. Chem. Phys.*, 2016, **18**, 16466–16475.
- [S4] B. Kishore, D. Shanmugasundaram, T. R. Penki, N. Munichandraiah, *J. Appl. Electrochem.*, 2014, **44**, 903–916.
- [S5] T. Chou, C. Huang, R. Doong, *Synthetic Metals*, 2014, **194**, 29–37.
- [S6] Y. Guo, J. Qi, Y. Jiang, S. Yang, Z. Wang, H. Xu, *Materials Chemistry and Physics*, 2003, **80**, 704–709.
- [S7] M. S. Balathanigaimani, W. G. Shim, M. J. Lee, C. Kim, J. W. Lee, H. Moon, *Electrochem Commun.*, 2008, **10**, 868–871.
